# Supplementary material for: Molecular Characterization of Highly Pathogenic Avian Influenza Viruses H5N6 Detected in Denmark in 2018–2019
Source: MDPI journal article supplement (doi:10.3390/v13061052), 2021-06-02
Supplement: s1 [file s1]

# Molecular Characterization of Highly Pathogenic Avian Influenza Viruses H5N6 Detected in Denmark 2018-2019

## Supplementary Material

**Figure S1.** Active surveillance for avian influenza virus in clinically healthy wild bird, Denmark, 2018. Birds were tested for avian influenza virus in pools of cloacal swab samples from up to five birds of the same species, sampled at the same time and location. Sampling locations are shown for each pool, with points distributed in concentric circles with origin in the center of the circles. Map made with QGIS (version 3.14.1) ([www.qgis.org](http://www.qgis.org)). Based on map of Denmark from Kortforsyningen ([www.kortforsyningen.dk](http://www.kortforsyningen.dk) downloaded 26 April 2012).

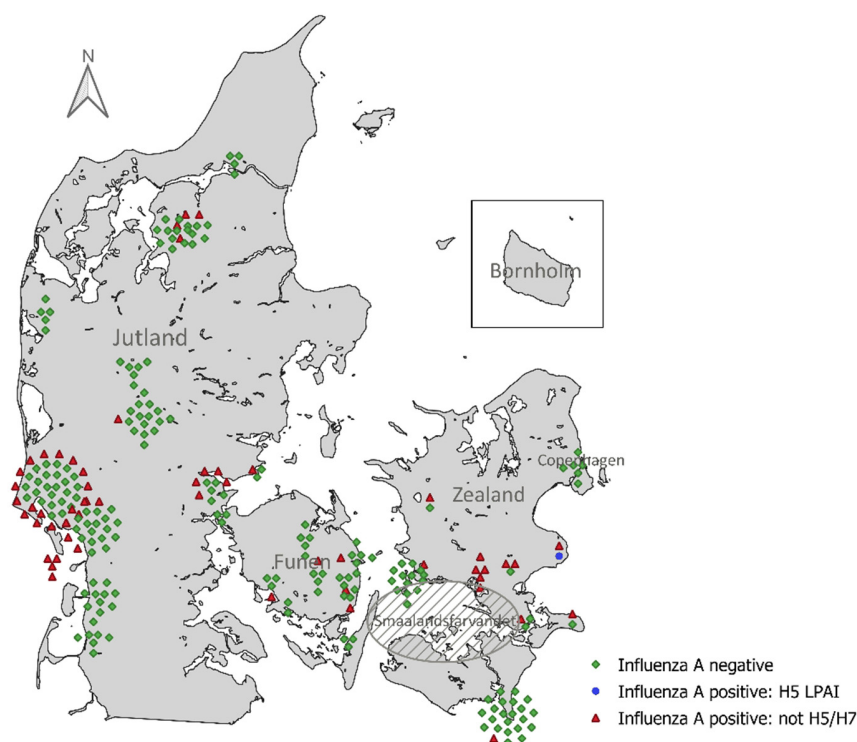

**Figure S2.** Active surveillance for avian influenza virus in clinically healthy wild bird, Denmark, 2019. Birds were tested for avian influenza virus in pools of cloacal swab samples from up to five birds of the same species, sampled at the same time and location. Sampling locations are shown for each pool, with points distributed in concentric circles with origin in the center of the circles. Map made with QGIS (version 3.14.1) ([www.qgis.org](http://www.qgis.org)). Based on map of Denmark from Kortforsyningen ([www.kortforsyningen.dk](http://www.kortforsyningen.dk) downloaded 26 April 2012).

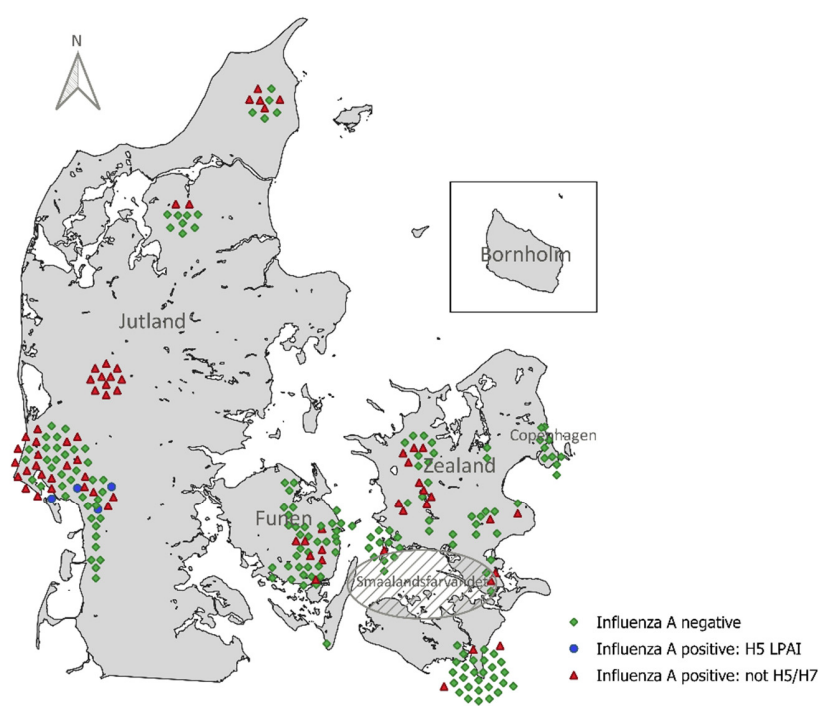

**Figure S3:** Sampling locations for avian influenza virus wild bird passive surveillance, Denmark, 2018. Map made with QGIS (version 3.14.1) ([www.qgis.org](http://www.qgis.org)). Based on map of Denmark from Kortforsyningen ([www.kortforsyningen.dk](http://www.kortforsyningen.dk) downloaded 26 April 2012).

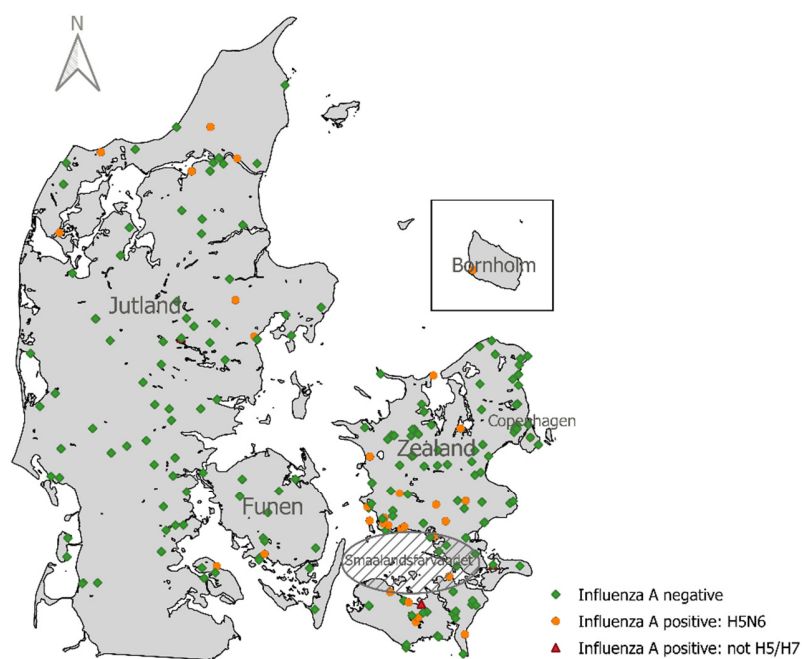

**Figure S4:** Sampling locations for avian influenza virus wild bird passive surveillance, Denmark, 2019. Map made with QGIS (version 3.14.1) ([www.qgis.org](http://www.qgis.org)). Based on map of Denmark from Kortforsyningen ([www.kortforsyningen.dk](http://www.kortforsyningen.dk) downloaded 26 April 2012).

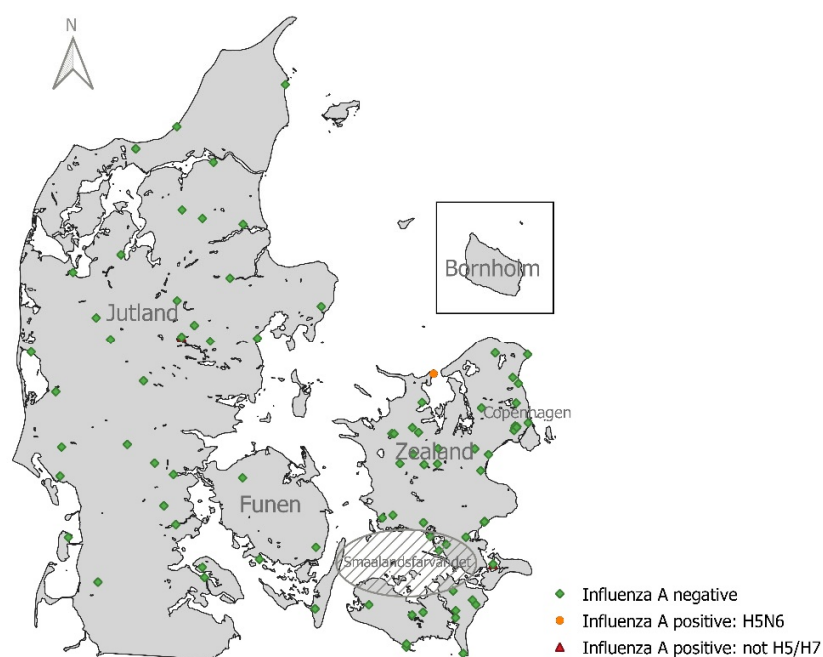

**Figure S5.** Bayesian phylogenetic analysis performed on each gene segments of H5N6 viruses detected in Denmark 2018–2019. Branch labels represent posterior probabilities. Scale bars indicate nucleotide substitutions per site.

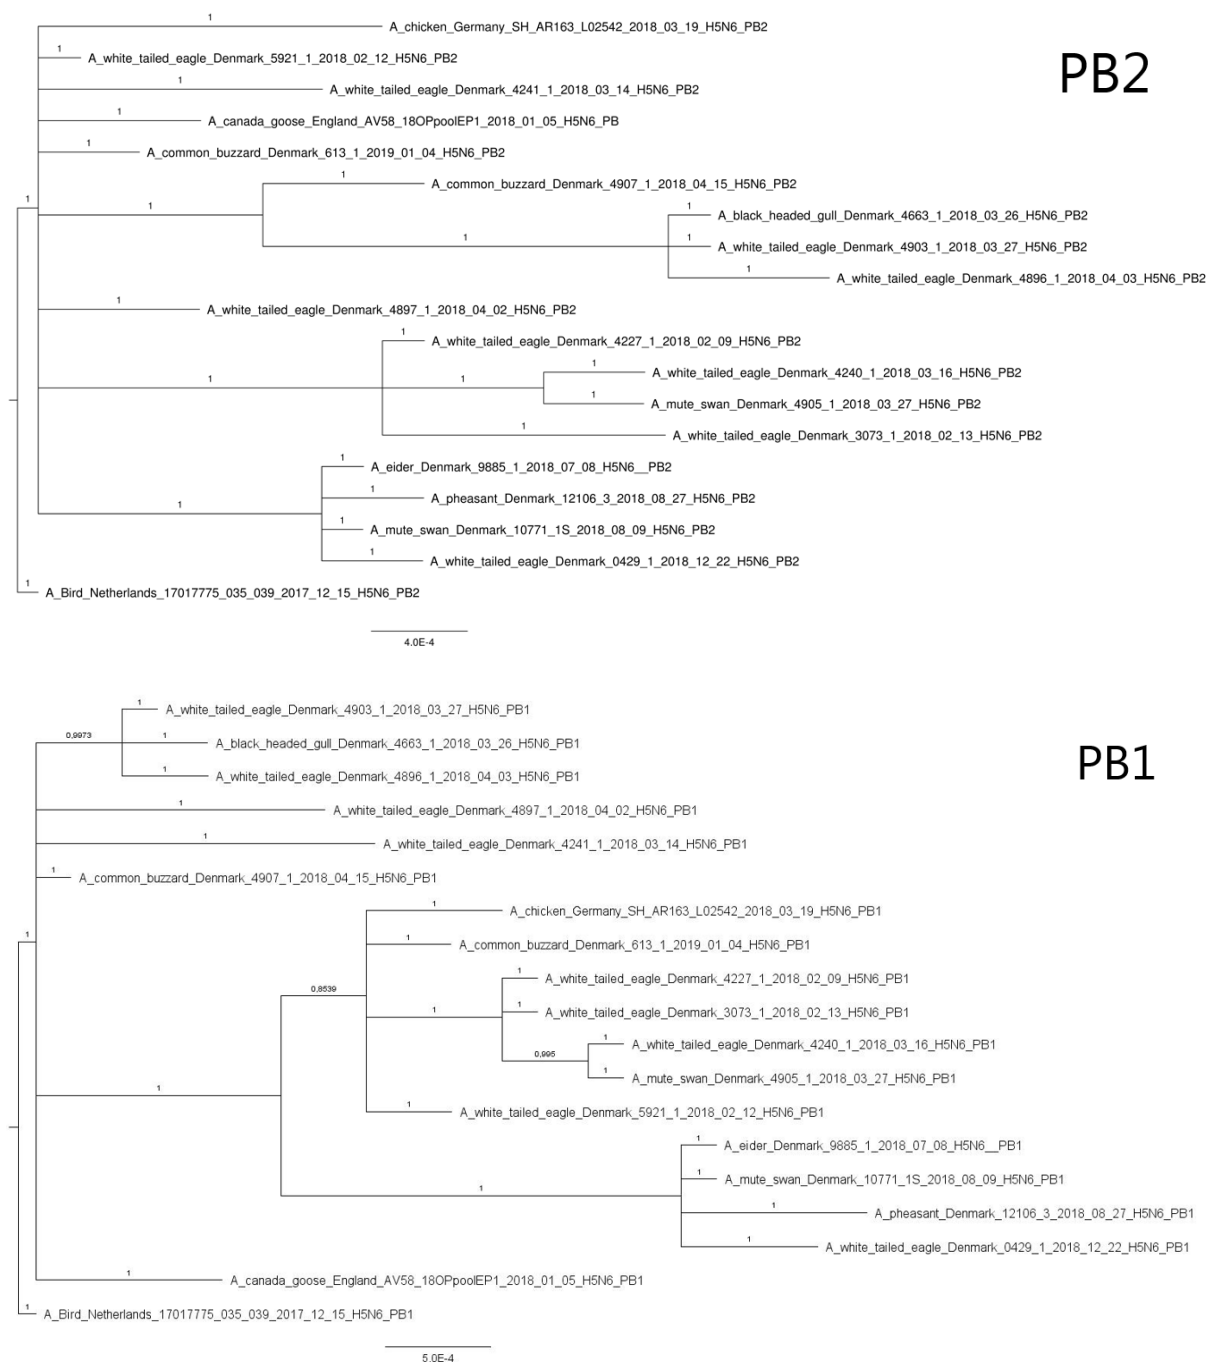

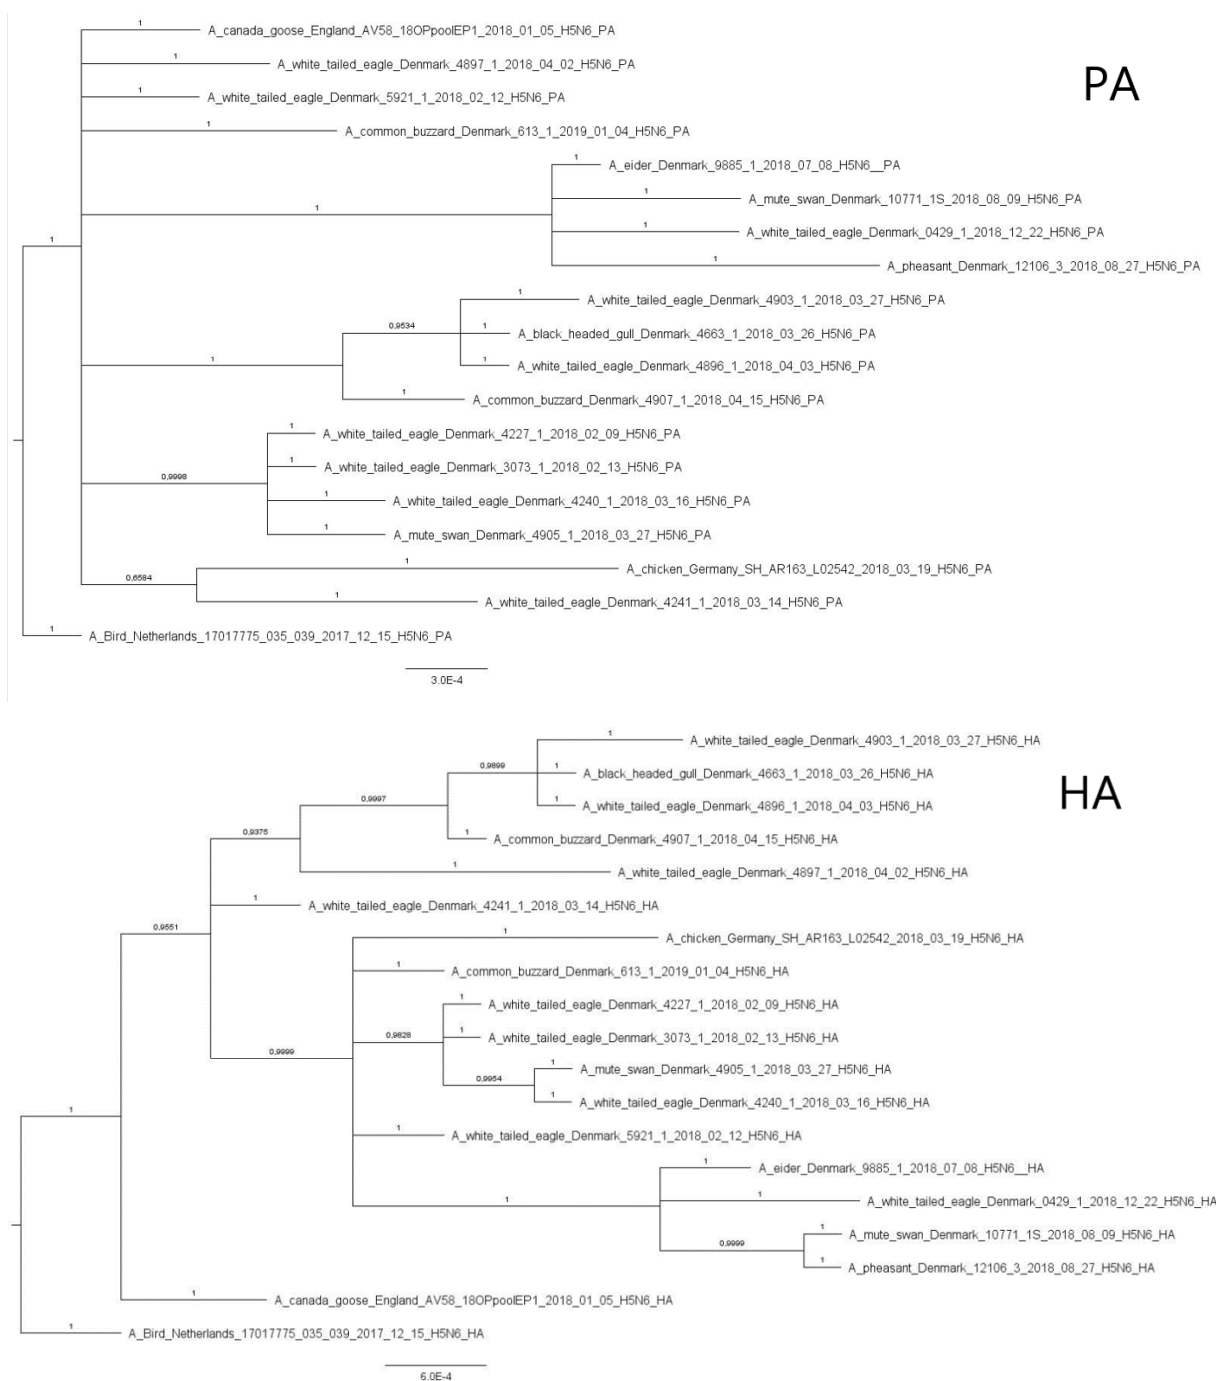

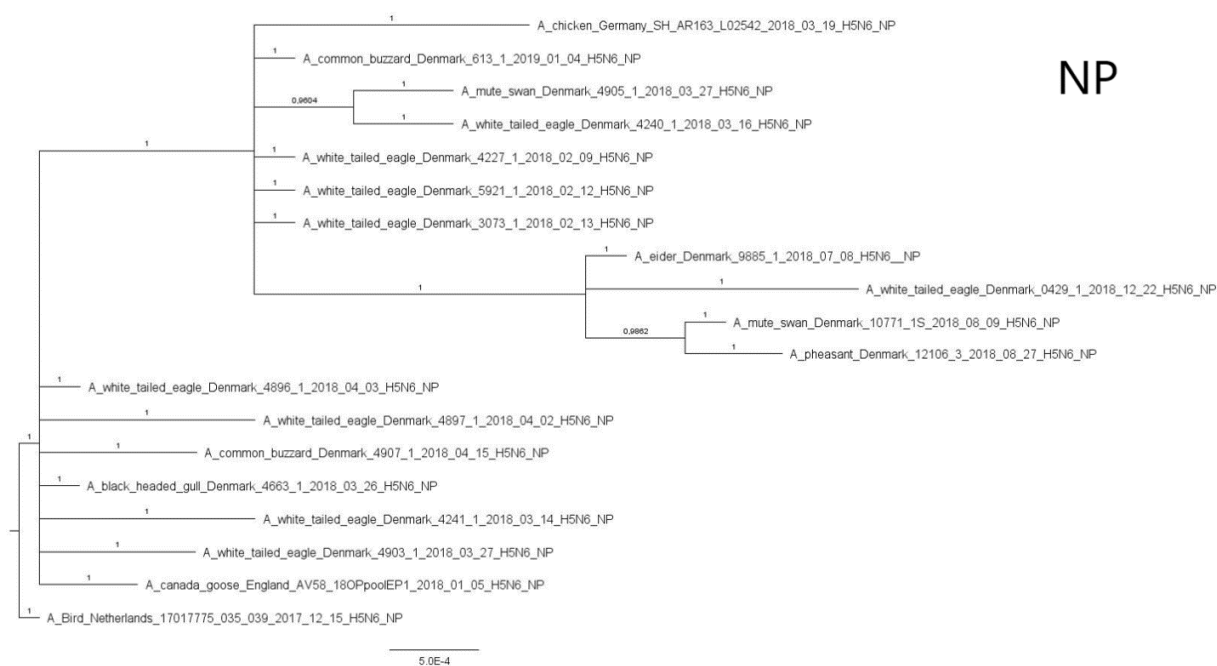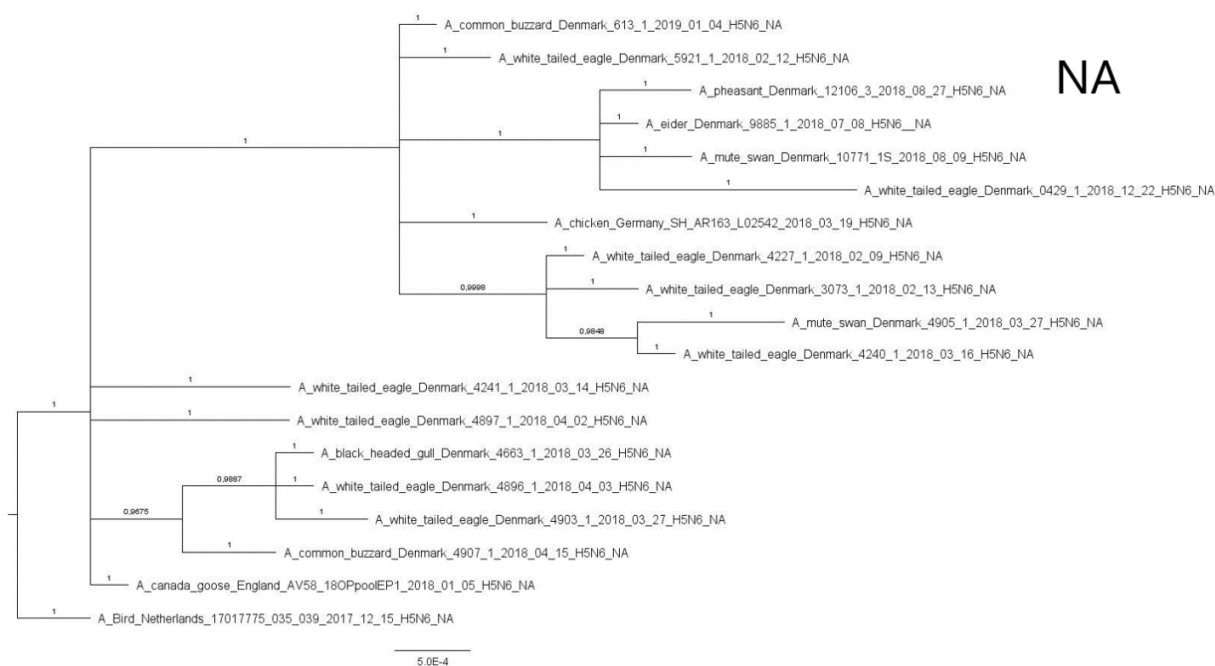

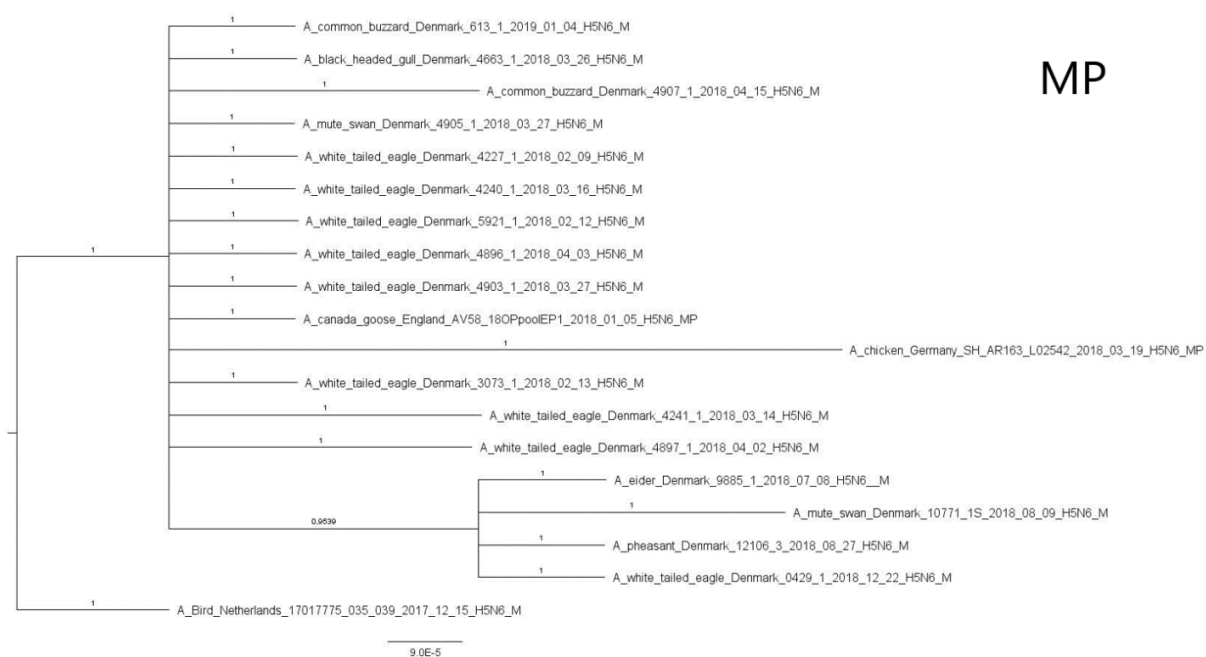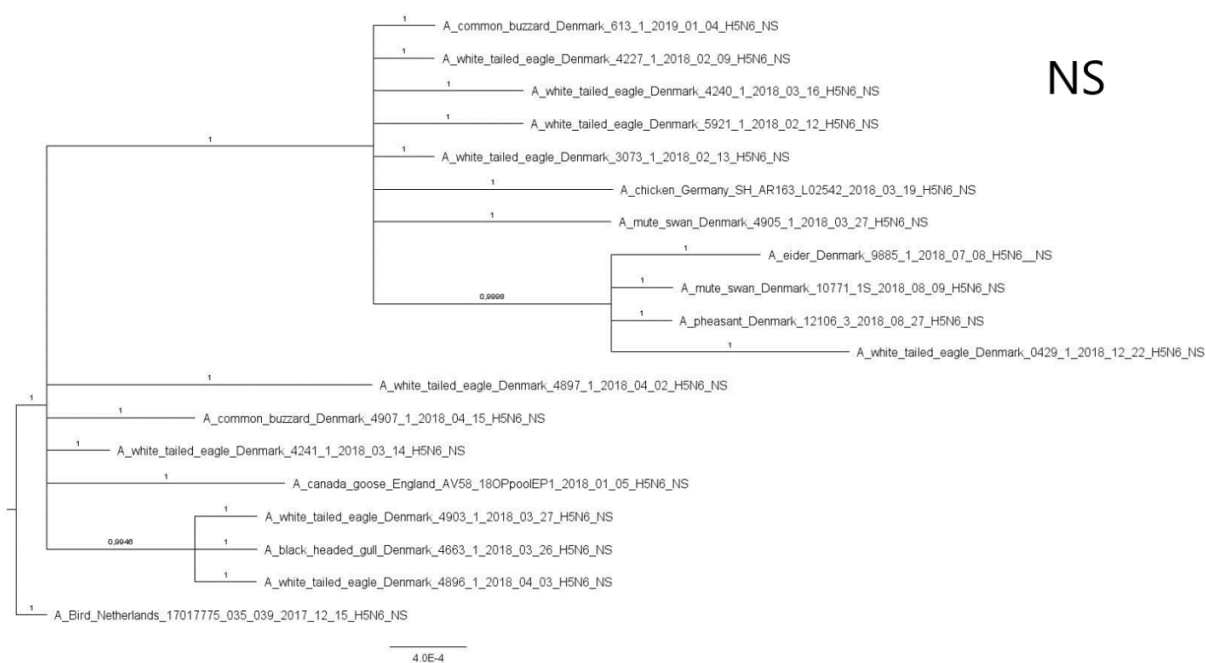



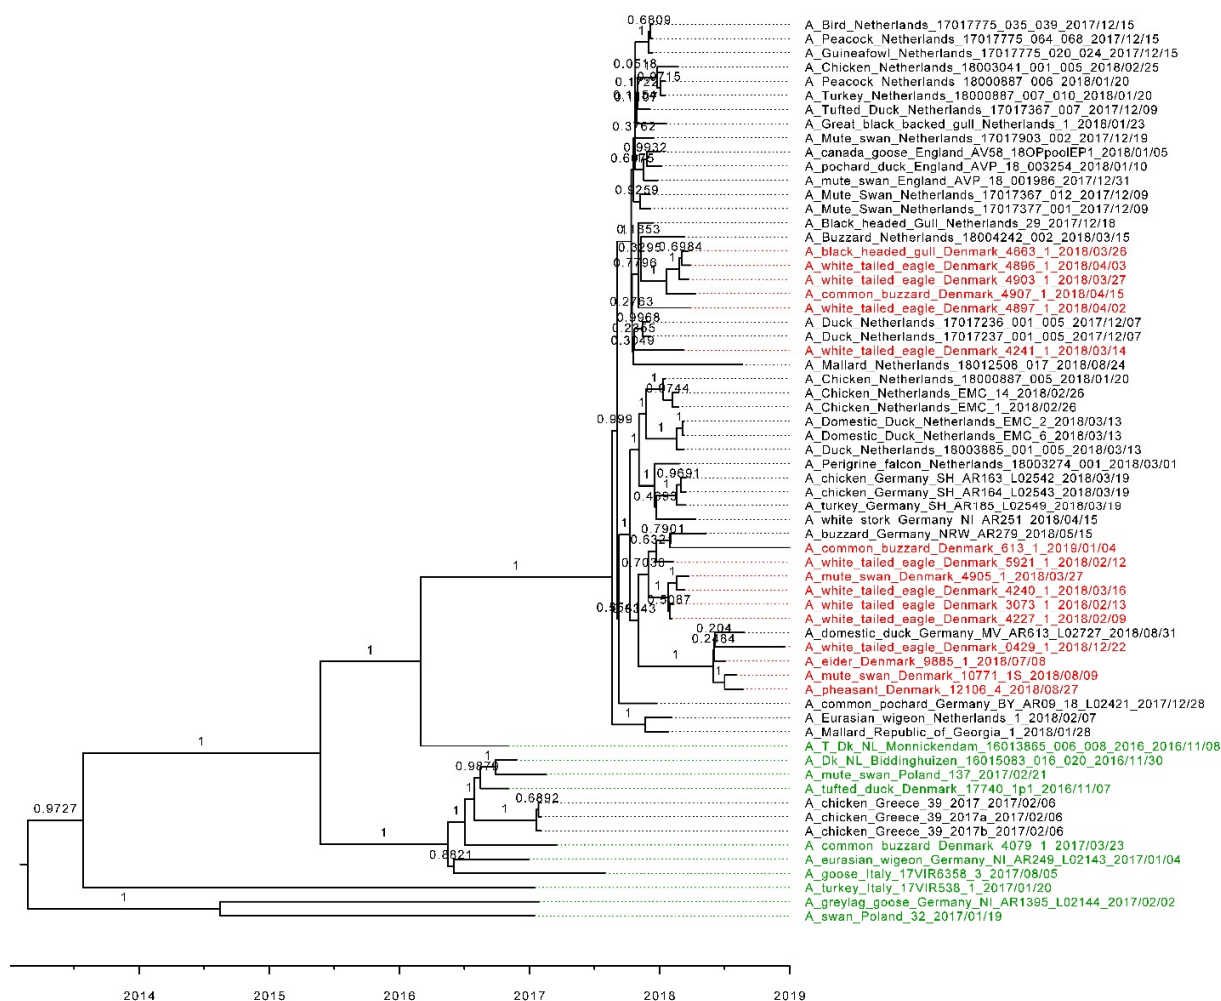

**Figure S7.** BEAST analysis on HA, NA and PB2 gene segments. Numbers above the nodes represent tMRCA. The HPAI H5N6 viruses from Denmark are in red. The scale bar depicts a timeline.

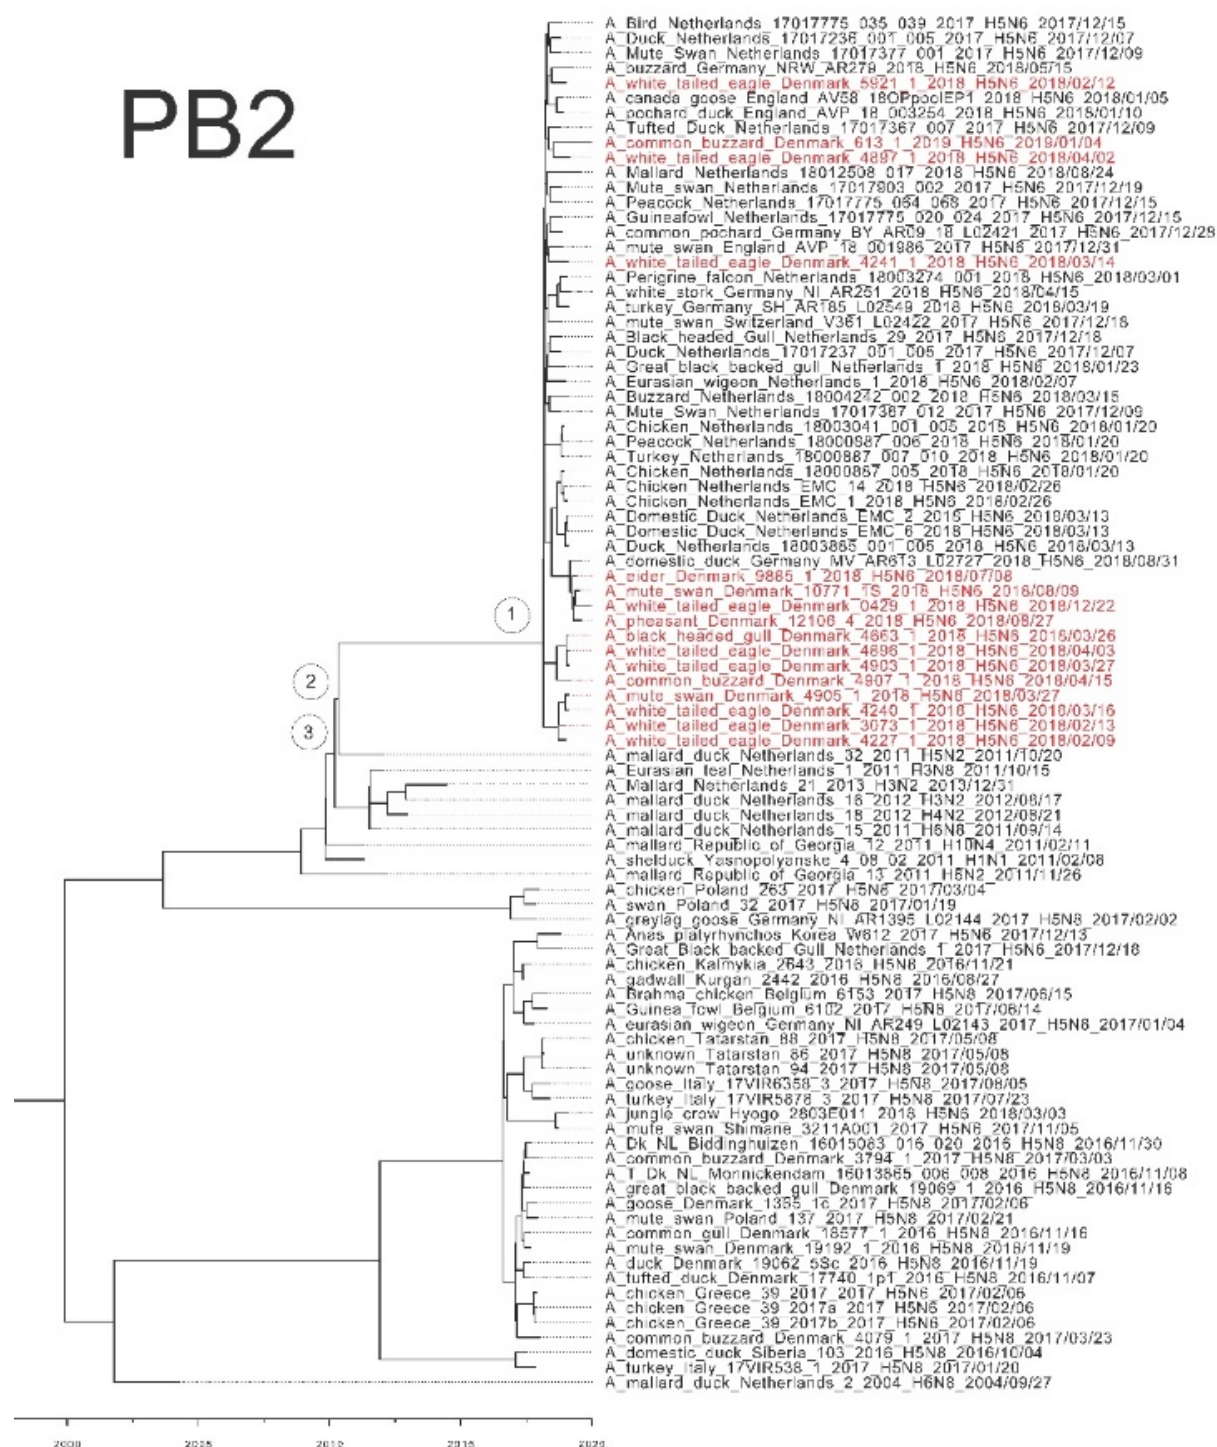

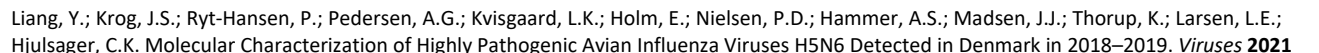



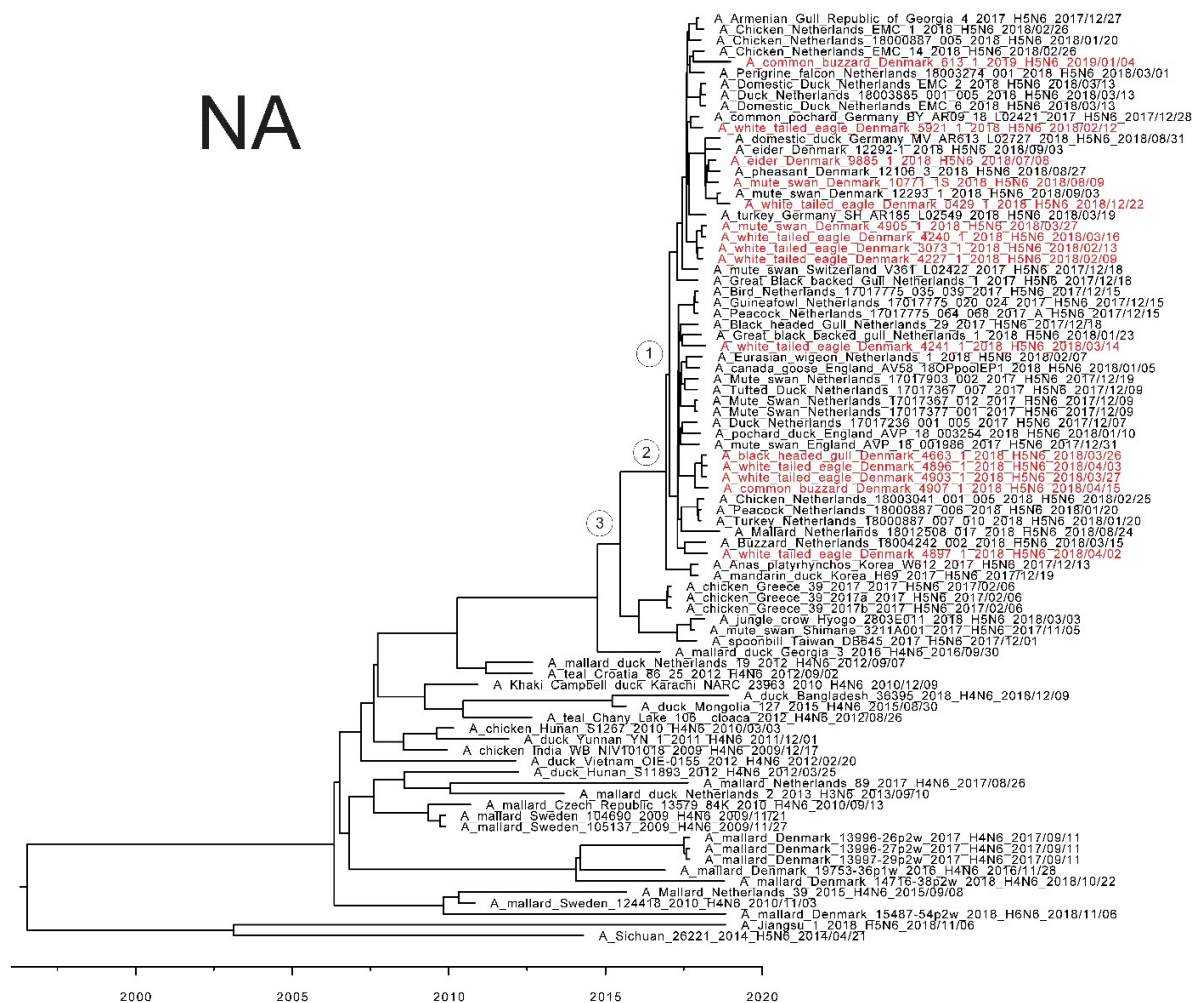

**Table S1.** Results from active surveillance for avian influenza virus in clinically healthy wild bird, Denmark, 2018

| Sampling time,<br>2018 quarter | Location   | Species               | No.<br>Birds | No.<br>Pools* | Avian influenza virus<br>positive pools | H5/H7 positive<br>pools |
|--------------------------------|------------|-----------------------|--------------|---------------|-----------------------------------------|-------------------------|
| 1                              | Copenhagen | Eurasian coot         | 5            | 1             | 0                                       | 0                       |
| 1                              | Copenhagen | Common moorhen        | 1            | 1             | 0                                       | 0                       |
| 1                              | Copenhagen | Mallard               | 5            | 1             | 0                                       | 0                       |
| 1                              | Copenhagen | Black-headed gull     | 1            | 1             | 0                                       | 0                       |
| 1                              | Copenhagen | Common gull           | 1            | 1             | 0                                       | 0                       |
| 3                              | Jutland    | Mallard               | 16           | 6             | 2                                       | 0                       |
| 3                              | Jutland    | Eurasian teal         | 42           | 13            | 8                                       | 0                       |
| 3                              | Jutland    | Eurasian wigeon       | 1            | 1             | 0                                       | 0                       |
| 3                              | Jutland    | Northern shoveler     | 3            | 2             | 1                                       | 0                       |
| 3                              | Jutland    | Northern pintail      | 2            | 2             | 0                                       | 0                       |
| 3                              | Jutland    | Mallard               | 50           | 10            | 5                                       | 0                       |
| 3                              | Jutland    | Greylag goose         | 1            | 1             | 0                                       | 0                       |
| 3                              | Jutland    | Common gull           | 2            | 2             | 0                                       | 0                       |
| 3                              | Zealand    | Mallard               | 13           | 3             | 0                                       | 0                       |
| 3                              | Zealand    | Gadwall               | 1            | 1             | 0                                       | 0                       |
| 3                              | Zealand    | Eurasian teal         | 2            | 1             | 1                                       | 0                       |
| 3                              | Zealand    | Eurasian sparrowhawk  | 8            | 4             | 0                                       | 0                       |
| 3                              | Zealand    | Common kestrel        | 1            | 1             | 0                                       | 0                       |
| 3                              | Zealand    | Mallard               | 40           | 8             | 6                                       | 1xH5 LPAI               |
| 4                              | Funen      | Eurasian coot         | 9            | 3             | 1                                       | 0                       |
| 4                              | Funen      | Common moorhen        | 4            | 2             | 0                                       | 0                       |
| 4                              | Funen      | Mallard               | 42           | 10            | 0                                       | 0                       |
| 4                              | Funen      | Black-headed gull     | 3            | 2             | 0                                       | 0                       |
| 4                              | Funen      | Mute swan             | 7            | 3             | 0                                       | 0                       |
| 4                              | Funen      | Mallard               | 69           | 17            | 4                                       | 0                       |
| 4                              | Jutland    | Barnacle goose        | 79           | 17            | 0                                       | 0                       |
| 4                              | Jutland    | Common moorhen        | 1            | 1             | 0                                       | 0                       |
| 4                              | Jutland    | Mallard               | 19           | 8             | 3                                       | 0                       |
| 4                              | Jutland    | Black-headed gull     | 3            | 1             | 0                                       | 0                       |
| 4                              | Jutland    | Eurasian teal         | 95           | 24            | 11                                      | 0                       |
| 4                              | Jutland    | Eurasian wigeon       | 14           | 5             | 0                                       | 0                       |
| 4                              | Jutland    | Eurasian woodcock     | 8            | 3             | 0                                       | 0                       |
| 4                              | Jutland    | Northern pintail      | 5            | 4             | 1                                       | 0                       |
| 4                              | Jutland    | Mallard               | 188          | 38            | 5                                       | 0                       |
| 4                              | Jutland    | Hooded crow           | 1            | 1             | 0                                       | 0                       |
| 4                              | Jutland    | Eurasian teal         | 12           | 3             | 0                                       | 0                       |
| 4                              | Jutland    | Common buzzard        | 1            | 1             | 0                                       | 0                       |
| 4                              | Jutland    | Whooper swan          | 4            | 4             | 0                                       | 0                       |
| 4                              | Jutland    | Common gull           | 1            | 1             | 0                                       | 0                       |
| 4                              | Copenhagen | Common gull           | 1            | 1             | 0                                       | 0                       |
| 4                              | Zealand    | Western jackdaw       | 5            | 1             | 0                                       | 0                       |
| 4                              | Zealand    | Barnacle goose        | 19           | 5             | 0                                       | 0                       |
| 4                              | Zealand    | Pheasant              | 10           | 2             | 0                                       | 0                       |
| 4                              | Zealand    | Rough-legged buzzard  | 1            | 1             | 0                                       | 0                       |
| 4                              | Zealand    | Greylag goose         | 11           | 3             | 0                                       | 0                       |
| 4                              | Zealand    | Mute swan             | 2            | 1             | 0                                       | 0                       |
| 4                              | Zealand    | Eurasian teal         | 2            | 2             | 0                                       | 0                       |
| 4                              | Zealand    | Eurasian wigeon       | 2            | 1             | 0                                       | 0                       |
| 4                              | Zealand    | Common wood pigeon    | 3            | 1             | 0                                       | 0                       |
| 4                              | Zealand    | Eurasian sparrowhawk  | 12           | 11            | 1                                       | 0                       |
| 4                              | Zealand    | European herring gull | 1            | 1             | 0                                       | 0                       |
| 4                              | Zealand    | Common kestrel        | 2            | 2             | 0                                       | 0                       |
| 4                              | Zealand    | Mallard               | 35           | 11            | 8                                       | 0                       |
| Total                          |            |                       | 866          | 251           | 57                                      | 1                       |

\*Wild birds were tested for avian influenza virus in pools of cloacal swab samples from up to five birds of the same species, sampled at the same time and location.

**Table S2.** Results from active surveillance for avian influenza virus in clinically healthy wild bird, Denmark, 2019

| Sampling time,<br>2019 quarter | Location   | Species               | No.<br>birds | No.<br>Pools* | Avian influenza virus<br>positive pools | H5/H7 positive<br>pools |
|--------------------------------|------------|-----------------------|--------------|---------------|-----------------------------------------|-------------------------|
| 1                              | Copenhagen | Eurasian Coot         | 1            | 1             | 0                                       | 0                       |
| 1                              | Copenhagen | Mallard               | 4            | 1             | 0                                       | 0                       |
| 1                              | Copenhagen | Tufted duck           | 4            | 1             | 0                                       | 0                       |
| 3                              | Funen      | Mute swan             | 1            | 1             | 0                                       | 0                       |
| 3                              | Funen      | Peregrine falcon      | 1            | 1             | 0                                       | 0                       |
| 3                              | Jutland    | Mallard               | 102          | 21            | 16                                      | 0                       |
| 3                              | Jutland    | Mallard               | 7            | 2             | 1                                       | 1xH5 LPAI               |
| 3                              | Jutland    | Eurasian teal         | 34           | 9             | 7                                       | 0                       |
| 3                              | Jutland    | Eurasian wigeo        | 5            | 2             | 1                                       | 0                       |
| 3                              | Jutland    | Northern shoveler     | 4            | 2             | 1                                       | 1xH5 LPAI               |
| 3                              | Zealand    | Mallard               | 50           | 12            | 7                                       | 0                       |
| 3                              | Zealand    | Merlin                | 1            | 1             | 1                                       | 0                       |
| 3                              | Zealand    | Eurasian sparrowhawk  | 12           | 8             | 0                                       | 0                       |
| 4                              | Funen      | Pheasant              | 40           | 8             | 0                                       | 0                       |
| 4                              | Funen      | Mallard               | 100          | 24            | 5                                       | 0                       |
| 4                              | Funen      | Eurasian coot         | 1            | 1             | 0                                       | 0                       |
| 4                              | Funen      | Mallard               | 6            | 3             | 1                                       | 0                       |
| 4                              | Funen      | Black-headed gull     | 7            | 2             | 0                                       | 0                       |
| 4                              | Funen      | Mute swan             | 6            | 3             | 0                                       | 0                       |
| 4                              | Funen      | Eurasian teal         | 2            | 2             | 1                                       | 0                       |
| 4                              | Jutland    | Mallard               | 48           | 10            | 2                                       | 0                       |
| 4                              | Jutland    | Mallard               | 24           | 9             | 2                                       | 0                       |
| 4                              | Jutland    | Gadwall               | 1            | 1             | 0                                       | 0                       |
| 4                              | Jutland    | Eurasian teal         | 30           | 9             | 5                                       | 1xH5 LPAI               |
| 4                              | Jutland    | Eurasian wigeon       | 68           | 17            | 10                                      | 1xH5 LPAI               |
| 4                              | Jutland    | Eurasian woodcock     | 2            | 1             | 0                                       | 0                       |
| 4                              | Jutland    | Northern pintail      | 3            | 3             | 0                                       | 0                       |
| 4                              | Jutland    | Common gull           | 48           | 10            | 0                                       | 0                       |
| 4                              | Copenhagen | Greylag goose         | 35           | 7             | 0                                       | 0                       |
| 4                              | Zealand    | Pheasant              | 80           | 16            | 0                                       | 0                       |
| 4                              | Zealand    | Mallard               | 50           | 11            | 6                                       | 0                       |
| 4                              | Zealand    | Barnacle goose        | 48           | 12            | 1                                       | 0                       |
| 4                              | Zealand    | Mallard               | 2            | 1             | 0                                       | 0                       |
| 4                              | Zealand    | Short-eared owl       | 1            | 1             | 0                                       | 0                       |
| 4                              | Zealand    | Common buzzard        | 1            | 1             | 0                                       | 0                       |
| 4                              | Zealand    | Eurasian wigeon       | 2            | 1             | 0                                       | 0                       |
| 4                              | Zealand    | Rook                  | 8            | 2             | 0                                       | 0                       |
| 4                              | Zealand    | Northern pintail      | 1            | 1             | 0                                       | 0                       |
| 4                              | Zealand    | Eurasian sparrowhawk  | 19           | 12            | 2                                       | 0                       |
| 4                              | Zealand    | Common ringed plover  | 1            | 1             | 0                                       | 0                       |
| 4                              | Zealand    | Common gull           | 15           | 3             | 0                                       | 0                       |
| 4                              | Zealand    | European herring gull | 17           | 4             | 1                                       | 0                       |
| Total                          |            |                       | 892          | 238           | 70                                      | 4                       |

\*Wild birds were tested for avian influenza virus in pools of cloacal swab samples from up to five birds of the same species, sampled at the same time and location.

**Table S3:** Results of avian influenza virus wild bird passive surveillance, Denmark, 2018

| Sampling time | Location        | Species               | Avian influenza virus result |
|---------------|-----------------|-----------------------|------------------------------|
| 01-02-2018    | Thisted         | Common buzzard        | Negative                     |
| 09-02-2018    | Næstved         | White-tailed eagle    | HPAI H5N6 detected           |
| 13-02-2018    | Slagelse        | White-tailed eagle    | HPAI H5N6 detected           |
| 12-02-2018    | Guldborgsund    | White-tailed eagle    | HPAI H5N6 detected           |
| 18-02-2018    | Greve           | Common buzzard        | Negative                     |
| 26-02-2018    | Slagelse        | Common buzzard        | Negative                     |
| 28-02-2018    | Hillerød        | Common buzzard        | Negative                     |
| 02-03-2018    | Lyngby-Taarbæk  | Common buzzard        | Negative                     |
| 02-03-2018    | Herning         | Common buzzard        | Negative                     |
| 02-03-2018    | Holbæk          | Common buzzard        | Negative                     |
| 03-03-2018    | Slagelse        | Eurasian bittern      | Negative                     |
| 03-03-2018    | Tønder          | Grey heron            | Negative                     |
| 06-03-2018    | Slagelse        | Grey heron            | Negative                     |
| 06-03-2018    | Thisted         | Eurasian eagle-owl    | Negative                     |
| 08-03-2018    | Faaborg-Midtfyn | Common buzzard        | Negative                     |
| 08-03-2018    | Syddjurs        | Common buzzard        | Negative                     |
| 08-03-2018    | Haderslev       | Common buzzard        | Negative                     |
| 10-03-2018    | Vordingborg     | Common kestrel        | Negative                     |
| 10-03-2018    | Thisted         | White-tailed eagle    | HPAI H5N6 detected           |
| 12-03-2018    | Aabenraa        | Common buzzard        | Negative                     |
| 14-03-2018    | Thisted         | White-tailed eagle    | HPAI H5N6 detected           |
| 15-03-2018    | Fredensborg     | Common buzzard        | Negative                     |
| 15-03-2018    | Guldborgsund    | Mute swan             | Negative                     |
| 15-03-2018    | Lolland         | Grey heron            | Negative                     |
| 15-03-2018    | Stevns          | Common buzzard        | Negative                     |
| 15-03-2018    | Guldborgsund    | Common buzzard        | Negative                     |
| 16-03-2018    | Svendborg       | Common buzzard        | Negative                     |
| 16-03-2018    | Lolland         | White-tailed eagle    | HPAI H5N6 detected           |
| 17-03-2018    | Faxe            | Common buzzard        | Negative                     |
| 18-03-2018    | Silkeborg       | Common buzzard        | Negative                     |
| 19-03-2018    | Vejle           | Common buzzard        | Negative                     |
| 20-03-2018    | Aalborg         | Common buzzard        | Negative                     |
| 20-03-2018    | Aalborg         | Common buzzard        | Negative                     |
| 20-03-2018    | Stevns          | Common buzzard        | Negative                     |
| 21-03-2018    | Gribskov        | Common buzzard        | Negative                     |
| 21-03-2018    | Syddjurs        | Common buzzard        | Negative                     |
| 22-03-2018    | Helsingør       | Grey heron            | Negative                     |
| 22-03-2018    | Svendborg       | Common buzzard        | Negative                     |
| 22-03-2018    | Odense          | Common buzzard        | Negative                     |
| 24-03-2018    | Mariagerfjord   | Common buzzard        | Negative                     |
| 24-03-2018    | Faaborg-Midtfyn | Common buzzard        | Negative                     |
| 24-03-2018    | Køge            | Common kestrel        | Negative                     |
| 24-03-2018    | Bornholm        | Common buzzard        | HPAI H5N6 detected           |
| 24-03-2018    | Aalborg         | Common buzzard        | HPAI H5N6 detected           |
| 25-03-2018    | Aalborg         | Hooded crow           | HPAI H5N6 detected           |
| 25-03-2018    | Aalborg         | Common buzzard        | HPAI H5N6 detected           |
| 25-03-2018    | Vordingborg     | Common buzzard        | Negative                     |
| 26-03-2018    | Lolland         | Great cormorant       | Negative                     |
| 26-03-2018    | Kolding         | Common buzzard        | Negative                     |
| 26-03-2018    | Helsingør       | Grey heron            | Negative                     |
| 26-03-2018    | Hedensted       | Common buzzard        | Negative                     |
| 26-03-2018    | Slagelse        | Black-headed gull     | HPAI H5N6 detected           |
| 26-03-2018    | Holbæk          | European herring gull | Negative                     |
| 26-03-2018    | Aalborg         | Mute swan             | Negative                     |
| 27-03-2018    | Sorø            | Common buzzard        | Negative                     |
| 27-03-2018    | Vejle           | Common buzzard        | Negative                     |
| 27-03-2018    | Lejre           | White-tailed eagle    | HPAI H5N6 detected           |
| 27-03-2018    | Slagelse        | White-tailed eagle    | HPAI H5N6 detected           |
| 27-03-2018    | Næstved         | White-tailed eagle    | HPAI H5N6 detected           |
| 27-03-2018    | Slagelse        | Great cormorant       | HPAI H5N6 detected           |
| 27-03-2018    | Slagelse        | European herring gull | HPAI H5N6 detected           |
| 27-03-2018    | Guldborgsund    | Mute swan             | HPAI H5N6 detected           |
| 28-03-2018    | Aalborg         | Hooded crow           | HPAI H5N6 detected           |

|            |                   |                       |                         |
|------------|-------------------|-----------------------|-------------------------|
| 28-03-2018 | Slagelse          | Common buzzard        | Negative                |
| 01-04-2018 | Tårnby            | Common buzzard        | HPAI H5N6 detected      |
| 01-04-2018 | Silkeborg         | Common buzzard        | Negative                |
| 02-04-2018 | Skanderborg       | Common buzzard        | Negative                |
| 02-04-2018 | Kalundborg        | Common buzzard        | HPAI H5N6 detected      |
| 02-04-2018 | Kalundborg        | Common buzzard        | HPAI H5N6 detected      |
| 02-04-2018 | Slagelse          | White-tailed eagle    | HPAI H5N6 detected      |
| 03-04-2018 | Slagelse          | Common buzzard        | Negative                |
| 03-04-2018 | Slagelse          | White-tailed eagle    | HPAI H5N6 detected      |
| 05-04-2018 | Favrskov          | Tawny owl             | Negative                |
| 08-04-2018 | Jammerbugt        | Common buzzard        | HPAI H5N6 detected      |
| 09-04-2018 | Favrskov          | Common buzzard        | HPAI H5N6 detected      |
| 11-04-2018 | Faxe              | Common buzzard        | HPAI H5N6 detected      |
| 11-04-2018 | Faaborg-Midtfyn   | Mute swan             | HPAI H5N6 detected      |
| 12-04-2018 | Kerteminde        | White-tailed eagle    | Negative                |
| 13-04-2018 | Faaborg-Midtfyn   | Common buzzard        | Negative                |
| 15-04-2018 | Sønderborg        | Common buzzard        | HPAI H5N6 detected      |
| 15-04-2018 | Aarhus            | Common buzzard        | HPAI H5N6 detected      |
| 18-04-2018 | Tønder            | Black-headed gull     | Negative                |
| 24-04-2018 | Ringsted          | Greylag goose         | Negative                |
| 09-05-2018 | Esbjerg           | Common eider          | Negative                |
| 22-05-2018 | Tårnby            | Mute swan             | Negative                |
| 28-05-2018 | Kalundborg        | Common eider          | Negative                |
| 03-07-2018 | Guldborgsund      | Mallard               | Negative                |
| 05-07-2018 | Gribskov          | Common buzzard        | Negative                |
| 08-07-2018 | Lolland           | Common eider          | HPAI H5N6 detected      |
| 03-08-2018 | Kalundborg        | Common pheasant       | Negative                |
| 03-08-2018 | Kalundborg        | Common pheasant       | Negative                |
| 03-08-2018 | Kalundborg        | Common pheasant       | Negative                |
| 03-08-2018 | Kalundborg        | Common pheasant       | Negative                |
| 03-08-2018 | Kalundborg        | Common pheasant       | Negative                |
| 07-08-2018 | Guldborgsund      | Mute swan             | Negative                |
| 09-08-2018 | Slagelse          | Mute swan             | HPAI H5N6 detected      |
| 15-08-2018 | Odsherred         | Great cormorant       | Negative                |
| 25-08-2018 | Guldborgsund      | Mute swan             | AIV detected, not H5/H7 |
| 25-08-2018 | Guldborgsund      | Mute swan             | AIV detected, not H5/H7 |
| 25-08-2018 | Guldborgsund      | Mute swan             | AIV detected, not H5/H7 |
| 25-08-2018 | Guldborgsund      | Mute swan             | AIV detected, not H5/H7 |
| 27-08-2018 | Faxe              | Greylag goose         | Negative                |
| 27-08-2018 | Slagelse          | Mallard               | HPAI H5N6               |
| 27-08-2018 | Slagelse          | Mallard               | HPAI H5N6               |
| 27-08-2018 | Slagelse          | Common pheasant       | HPAI H5N6               |
| 27-08-2018 | Slagelse          | Common pheasant       | HPAI H5N6               |
| 02-09-2018 | Middelfart        | Mute swan             | Negative                |
| 03-09-2018 | Lolland           | Greylag goose         | HPAI H5N6 detected      |
| 03-09-2018 | Guldborgsund      | Mute swan             | HPAI H5N6 detected      |
| 03-09-2018 | Guldborgsund      | Common eider          | HPAI H5N6 detected      |
| 07-09-2018 | Lolland           | Mute swan             | Negative                |
| 10-09-2018 | Varde             | European herring gull | Negative                |
| 23-08-2018 | Vejle             | Osprey                | Negative                |
| 06-09-2018 | Silkeborg         | White-tailed eagle    | Negative                |
| 15-09-2018 | Vejle             | Grey heron            | Negative                |
| 19-09-2018 | Slagelse          | Common pheasant       | HPAI H5N6 detected      |
| 19-09-2018 | Slagelse          | Common pheasant       | HPAI H5N6 detected      |
| 19-09-2018 | Slagelse          | Common pheasant       | HPAI H5N6 detected      |
| 24-09-2018 | Ringkøbing-Skjern | Barn owl              | Negative                |
| 24-09-2018 | Faxe              | European herring gull | Negative                |
| 26-09-2018 | Dragør            | Common kestrel        | Negative                |
| 05-10-2018 | Køge              | European herring gull | Negative                |
| 15-10-2018 | Vejle             | Grey heron            | Negative                |
| 15-10-2018 | Skive             | Great cormorant       | Negative                |
| 15-10-2018 | Skive             | Great cormorant       | Negative                |
| 15-10-2018 | Skive             | Great cormorant       | Negative                |
| 15-10-2018 | Skive             | Great cormorant       | Negative                |
| 15-10-2018 | København         | Eurasian magpie       | Negative                |
| 21-10-2018 | Horsens           | Common kestrel        | Negative                |



---

|            |              |                       |                    |
|------------|--------------|-----------------------|--------------------|
| 24-10-2018 | Guldborgsund | Mute swan             | Negative           |
| 26-10-2018 | Sorø         | Common buzzard        | Negative           |
| 30-10-2018 | Holbæk       | European herring gull | Negative           |
| 05-11-2018 | Tønder       | Common buzzard        | Negative           |
| 12-11-2018 | Slagelse     | Barnacle goose        | Negative           |
| 12-11-2018 | Slagelse     | Barnacle goose        | Negative           |
| 12-11-2018 | Slagelse     | Barnacle goose        | Negative           |
| 12-11-2018 | Slagelse     | Barnacle goose        | Negative           |
| 17-11-2018 | Odense       | Eurasian woodcock     | Negative           |
| 25-11-2018 | Haderslev    | Common buzzard        | Negative           |
| 17-12-2018 | Sønderborg   | Mallard               | Negative           |
| 17-12-2018 | Holbæk       | Common buzzard        | Negative           |
| 17-12-2018 | Assens       | Common buzzard        | Negative           |
| 20-12-2018 | Vordingborg  | Mute swan             | Negative           |
| 20-11-2018 | Aalborg      | Golden eagle          | Negative           |
| 22-12-2018 | Næstved      |                       | HPAI H5N6 detected |
| 23-11-2018 | Guldborgsund | Common buzzard        | Negative           |
|            | Total        |                       | 42 HPAI H5N6       |

---

**Table S4.** Results of avian influenza virus wild bird passive surveillance, Denmark, 2019.

| Sampling time | Location          | Species               | Avian influenza virus result |
|---------------|-------------------|-----------------------|------------------------------|
| 01-01-2019    | Sønderborg        | Common buzzard        | Negative                     |
| 01-01-2019    | Sønderborg        | Red kite              | Negative                     |
| 01-01-2019    | Næstved           | Mute swan             | Negative                     |
| 03-01-2019    | Faxe              | Common kestrel        | Negative                     |
| 04-01-2019    | Odsherred         | Common buzzard        | HPAI H5N6 detected           |
| 15-01-2019    | Køge              | Peregrine falcon      | Negative                     |
| 16-01-2019    | Gribskov          | Common buzzard        | Negative                     |
| 17-01-2019    | Holbæk            | Common buzzard        | Negative                     |
| 20-01-2019    | Esbjerg           | Common buzzard        | Negative                     |
| 20-01-2019    | Guldborgsund      | Common buzzard        | Negative                     |
| 21-01-2019    | Ringsted          | Hen harrier           | Negative                     |
| 22-01-2019    | Jammerbugt        | Common murre          | Negative                     |
| 22-01-2019    | Jammerbugt        | Common murre          | Negative                     |
| 22-01-2019    | Billund           | Whooper swan          | Negative                     |
| 22-01-2019    | Jammerbugt        | Razorbill             | Negative                     |
| 23-01-2019    | Guldborgsund      | Common buzzard        | Negative                     |
| 24-01-2019    | Guldborgsund      | Mute swan             | Negative                     |
| 26-01-2019    | Lolland           | Rough-legged buzzard  | Negative                     |
| 28-01-2019    | Langeland         | Great cormorant       | Negative                     |
| 28-01-2019    | Langeland         | Great cormorant       | Negative                     |
| 28-01-2019    | Langeland         | Great cormorant       | Negative                     |
| 28-01-2019    | Rebild            | Common buzzard        | Negative                     |
| 30-01-2019    | Slagelse          | Common buzzard        | Negative                     |
| 30-01-2019    | Odsherred         | Common buzzard        | Negative                     |
| 03-02-2019    | Sorø              | Common buzzard        | Negative                     |
| 04-02-2019    | Guldborgsund      | Peregrine falcon      | Negative                     |
| 05-02-2019    | Roskilde          | Common buzzard        | Negative                     |
| 11-02-2019    | Vordingborg       | Northern goshawk      | Negative                     |
| 11-02-2019    | Guldborgsund      | Common buzzard        | Negative                     |
| 12-03-2019    | Guldborgsund      | Red kite              | Negative                     |
| 15-02-2019    | Lolland           | White-tailed eagle    | Negative                     |
| 15-02-2019    | Herning           | Common buzzard        | Negative                     |
| 16-02-2019    | Silkeborg         | Whooper swan          | AIV detected, not H5/H7      |
| 16-02-2019    | Silkeborg         | Whooper swan          | Negative                     |
| 18-02-2019    | Ringkøbing-Skjern | Common buzzard        | Negative                     |
| 18-02-2019    | Silkeborg         | Common buzzard        | Negative                     |
| 20-02-2019    | Faxe              | Common gull           | Negative                     |
| 20-02-2019    | Faxe              | Hooded crow           | Negative                     |
| 21-02-2019    | Faaborg-Midtfyn   | Great cormorant       | Negative                     |
| 21-02-2019    | Hørsholm          | Mute swan             | Negative                     |
| 23-02-2019    | Sorø              | Common buzzard        | Negative                     |
| 23-02-2019    | Sorø              | Common buzzard        | Negative                     |
| 28-02-2019    | Nordfyns          | Common buzzard        | Negative                     |
| 28-02-2019    | Nordfyns          | Common buzzard        | Negative                     |
| 02-03-2019    | Vesthimmerlands   | Eurasian sparrowhawk  | Negative                     |
| 10-03-2019    | Varde             | Common buzzard        | Negative                     |
| 11-03-2019    | Egedal            | Eurasian sparrowhawk  | Negative                     |
| 12-03-2019    | Helsingør         | European herring gull | Negative                     |
| 12-03-2019    | Helsingør         | European herring gull | Negative                     |
| 18-03-2019    | Lolland           | Mute swan             | Negative                     |
| 19-03-2019    | Holbæk            | Common buzzard        | Negative                     |
| 24-03-2019    | Mariagerfjord     | Eurasian magpie       | Negative                     |
| 24-03-2019    | Mariagerfjord     | Eurasian sparrowhawk  | Negative                     |
| 27-03-2019    | Lolland           | Great cormorant       | Negative                     |
| 01-04-2019    | Ringkøbing-Skjern | Mute swan             | Negative                     |
| 15-04-2019    | Ringsted          | Common buzzard        | Negative                     |
| 15-04-2019    | Kolding           | Black-headed gull     | Negative                     |
| 15-04-2019    | Kolding           | Gulls, terns          | Negative                     |
| 20-04-2019    | Kolding           | Common buzzard        | Negative                     |
| 20-04-2019    | Kolding           | Common buzzard        | Negative                     |
| 24-04-2019    | Vordingborg       | White-tailed eagle    | Negative                     |
| 30-04-2019    | Holbæk            | Common buzzard        | Negative                     |
| 25-05-2019    | Randers           | Common buzzard        | Negative                     |

|            |               |                        |                         |
|------------|---------------|------------------------|-------------------------|
| 27-05-2019 | Gentofte      | Eurasian coot          | Negative                |
| 27-05-2019 | Guldborgsund  | Common buzzard         | Negative                |
| 10-06-2019 | Syddjurs      | Common buzzard         | Negative                |
| 12-06-2019 | Ikast-Brande  | Western jakdaw         | Negative                |
| 11-07-2019 | Jammerbugt    | European herring gull  | Negative                |
| 11-07-2019 | Jammerbugt    | European herring gull  | Negative                |
| 11-07-2019 | Jammerbugt    | European herring gull  | Negative                |
| 09-07-2019 | Vordingborg   | European herring gull  | Negative                |
| 09-07-2019 | Vordingborg   | European herring gull  | Negative                |
| 09-07-2019 | Vordingborg   | European herring gull  | Negative                |
| 09-07-2019 | Vordingborg   | European herring gull  | AIV detected, not H5/H7 |
| 09-07-2019 | Vordingborg   | European herring gull  | Negative                |
| 09-07-2019 | Vordingborg   | European herring gull  | Negative                |
| 09-07-2019 | Vordingborg   | European herring gull  | Negative                |
| 23-07-2019 | Solrød        | Eurasian magpie        | Negative                |
| 31-07-2019 | København     | Mallard                | Negative                |
| 31-07-2019 | København     | Mallard                | Negative                |
| 31-07-2019 | Rødovre       | Eurasian coot          | Negative                |
| 31-07-2019 | Rødovre       | Eurasian coot          | Negative                |
| 31-07-2019 | København     | Black-headed gull      | Negative                |
| 31-07-2019 | København     | Mallard                | Negative                |
| 05-08-2019 | Holbæk        | Mallard                | Negative                |
| 05-08-2019 | Holbæk        | Mallard                | Negative                |
| 06-08-2019 | Viborg        | Mute swan              | Negative                |
| 23-08-2019 | Holbæk        | European honey buzzard | Negative                |
| 29-08-2019 | København     | European herring gull  | Negative                |
| 31-08-2019 | Sønderborg    | Mute swan              | Negative                |
| 03-09-2019 | København     | Eurasian teal          | Negative                |
| 05-09-2019 | Hvidovre      | Mallard                | Negative                |
| 07-09-2019 | Svendborg     | White-tailed eagle     | Negative                |
| 15-09-2019 | Frederikshavn | European herring gull  | Negative                |
| 24-09-2019 | Herning       | Rook                   | Negative                |
| 25-09-2019 | Aarhus        | Great cormorant        | Negative                |
| 02-10-2019 | Haderslev     | Eurasian sparrowhawk   | Negative                |
| 14-10-2019 | Skive         | Black-headed gull      | Negative                |
| 03-11-2019 | Næstved       | Red kite               | Negative                |
| 09-11-2019 | Fredensborg   | Northern goshawk       | Negative                |
| 17-11-2019 | Aalborg       | Eurasian coot          | Negative                |
| 18-11-2019 | Kolding       | Barn owl               | Negative                |
| 18-11-2019 | Kolding       | Barn owl               | Negative                |
| 21-11-2019 | Næstved       | Common buzzard         | Negative                |
| 22-11-2019 | Tønder        | Northern goshawk       | Negative                |
| 07-12-2019 | Struer        | Black-headed gull      | Negative                |
| 10-12-2019 | København     | Great cormorant        | Negative                |
|            | Total         |                        | 1 HPAI H5N6             |

**Table S5:** Details of the Danish clade 2.3.4.4b H5N6 HPAIV that have been sequenced in this study

| Virus                                     | Subtype | Sampling location in Denmark | Collection date | Material         | GenBank accession no. |
|-------------------------------------------|---------|------------------------------|-----------------|------------------|-----------------------|
| A/white-tailed eagle/Denmark/4227-01/2018 | H5N6    | Næstved                      | 09/02/2018      | Primary material | MT781548 - MT781554   |
| A/white-tailed eagle/Denmark/5921-01/2018 | H5N6    | Guldborgsund                 | 12/02/2018      | Primary material | MT781596 - MT781603   |
| A/white-tailed eagle/Denmark/3073-01/2018 | H5N6    | Slagelse                     | 13/02/2018      | Primary material | MT781540 - MT781547   |
| A/white-tailed eagle/Denmark/4241-01/2018 | H5N6    | Thisted                      | 10/03/2018      | Primary material | MT781564 - MT781571   |
| A/white-tailed eagle/Denmark/4240-01/2018 | H5N6    | Lolland                      | 16/03/2018      | Primary material | MT781556 - MT781563   |
| A/black-headed gull/Denmark/4663-01/2018  | H5N6    | Slagelse                     | 26/03/2018      | Primary material | MT781476 - MT781483   |
| A/mute swan/Denmark/4905-01/2018          | H5N6    | Guldborgsund                 | 27/03/2018      | Primary material | MT781516 - MT781523   |
| A/white-tailed eagle/Denmark/4903-01/2018 | H5N6    | Slagelse                     | 27/03/2018      | Primary material | MT781588 - MT781596   |
| A/white-tailed eagle/Denmark/4897-01/2018 | H5N6    | Slagelse                     | 02/04/2018      | Primary material | MT781580 - MT781587   |
| A/white-tailed eagle/Denmark/4896-01/2018 | H5N6    | Slagelse                     | 03/04/2018      | Isolate          | MT781572 - MT781579   |
| A/common buzzard/Denmark/4907/2018        | H5N6    | Sønderborg                   | 15/04/2018      | Primary material | MT781484 - MT781491   |
| A/eider/Denmark/9885-01/1/2018            | H5N6    | Lolland                      | 08/07/2018      | Primary material | MT781500 - MT781507   |
| A/mute swan/Denmark/10771-01S/2018        | H5N6    | Slagelse                     | 09/08/2018      | Primary material | MT781508 - MT781515   |
| A/mallard/Denmark/12106-01/2018           | H5N6    | Slagelse                     | 27/08/2018      | Primary material | MT781472              |
| A/mallard/Denmark/12106-02/2018           | H5N6    | Slagelse                     | 27/08/2018      | Primary material | MT781473              |
| A/pheasant/Denmark/12106-03/2018          | H5N6    | Slagelse                     | 27/08/2018      | Primary material | MT781524 - MT781531   |
| A/mute swan/Denmark/12293-1/2018          | H5N6    | Guldborgsund                 | 03/09/2018      | Primary material | MT781474 - MT781475   |
| A/eider/Denmark/12292-1/2018              | H5N6    | Guldborgsund                 | 03/09/2018      | Primary material | MT781470 - MT781471   |
| A/white-tailed eagle/Denmark/0429-01/2018 | H5N6    | Næstved                      | 22/12/2018      | Primary material | MT781532 - MT781539   |
| A/common buzzard/Denmark/0613-01/2019     | H5N6    | Odsherred                    | 04/01/2019      | Primary material | MT781492 - MT781499   |

**Table S6:** Risk signatures. Based on Beerens, N.; Koch, G.; Heutink, R.; Harders, F.; Vries, D.P.E.; Ho, C.; Bossers, A.; Elbers, A. Novel highly pathogenic avian influenza A(H5N6) virus in the Netherlands, december 2017. *Emerg. Infect. Dis.* **2018**, *24*, 770–773, doi:10.3201/eid2404.172124.

| Protein | Position               | Present   | Increased                            |
|---------|------------------------|-----------|--------------------------------------|
| PB2     | D265G                  | No        | Replication                          |
|         | Q591K                  | No        | Replication                          |
|         | E627K                  | No        | Virulence                            |
|         | D701N                  | No        | Replication                          |
|         | S714R                  | No        | Replication                          |
| PB1     | V3A                    | No        | Virulence                            |
|         | H99Y                   | No        | Airborne transmission                |
|         | K207R                  | No        | Virulence                            |
|         | N328K                  | No        | Virulence                            |
|         | I368V                  | No        | Airborne transmission                |
|         | N375S                  | No        | Virulence                            |
| PA      | T85I                   | No        | Replication                          |
|         | T97I                   | No        | Virulence                            |
|         | G186M                  | No        | Replication                          |
|         | L336S                  | No        | Replication                          |
|         | S409N                  | No        | Human transmission                   |
|         | K615N                  | No        | Replication                          |
|         | G631S                  | No        | Virulence                            |
| H5      | Various residues       | No        | Binding to a2,6                      |
|         | 119Y, 172A, 238L, 240S | Only 172A | Airborne transmission                |
|         | 450K, 459K, 403I       | No        | Acid stability                       |
| NP      | R99K                   | No        | Airborne transmission                |
|         | N391K                  | No        | Replication                          |
|         | S345N                  | No        | Airborne transmission                |
|         | Q357K                  | No        | Virulence                            |
| N6      | V116A                  | No        | Resistance to oseltamivir, zanamivir |
|         | E119V                  | No        | Resistance to oseltamivir, zanamivir |
|         | Q136K                  | No        | Resistance to zanamivir              |
|         | D199N                  | Yes       | Resistance to oseltamivir            |
| M1      | N30D                   | Yes*      | Virulence                            |
|         | T139A                  | No        | Virulence                            |
|         | Y215A                  | Yes*      | Virulence                            |
| NS1     | P42S                   | Yes*      | Virulence                            |
|         | D92E                   | No        | Virulence                            |
|         | L103F                  | Yes*      | Virulence                            |
|         | I106M                  | Yes*      | Virulence                            |
|         | 80-04                  | No        | Virulence                            |

\*Features of H5 clade 2.3.4.4 viruses.

**Table S7:** Acknowledgement of laboratories providing sequences to the GISAID EpiFlu database and NCBI Genbank database.

| GISAID<br>Isolate ID/<br>Genbank<br>Accession<br>no. | Country            | Isolate Name                                        | Subtype | Collection<br>Date | Submitting Laboratory                |
|------------------------------------------------------|--------------------|-----------------------------------------------------|---------|--------------------|--------------------------------------|
| EPI_ISL_33<br>2433                                   | The<br>Netherlands | A/Bird/Netherlands/17017775-035-039/2017            | H5N6    | 15/12/2017         | Wageningen<br>Bioveterinary Research |
| EPI_ISL_33<br>2434                                   | The<br>Netherlands | A/Peacock/Netherlands/17017775-064-068/2017         | H5N6    | 15/12/2017         | Wageningen<br>Bioveterinary Research |
| EPI_ISL_33<br>2432                                   | The<br>Netherlands | A/Guineafowl/Netherlands/17017775-020-024/2017      | H5N6    | 15/12/2017         | Wageningen<br>Bioveterinary Research |
| EP_ISL_332<br>430                                    | The<br>Netherlands | A/Chicken/Netherlands/18003041-001-005/2018         | H5N6    | 25/05/2018         | Wageningen<br>Bioveterinary Research |
| EPI_ISL_33<br>2436                                   | The<br>Netherlands | A/Peacock/Netherlands/18000887-006/2018             | H5N6    | 20/01/2018         | Wageningen<br>Bioveterinary Research |
| EPI_ISL_33<br>2437                                   | The<br>Netherlands | A/Turkey/Netherlands/18000887-007-010/2018          | H5N6    | 20/01/2018         | Wageningen<br>Bioveterinary Research |
| EPI_ISL_29<br>2225                                   | England            | A/canada<br>goose/England/AV58_18OPpoolEP1/<br>2018 | H5N6    | 05/01/2018         | Animal and Plant Health<br>Agency    |
| EPI_ISL_29<br>2224                                   | England            | A/porchard<br>duck/England/AVP_18_003254/2018       | H5N6    | 10/01/2018         | Animal and Plant Health<br>Agency    |
| EPI_ISL_29<br>2223                                   | England            | A/mute<br>swan/England/AVP_18_001986/2017           | H5N6    | 31/12/2017         | Animal and Plant Health<br>Agency    |
| EPI_ISL_28<br>8412                                   | The<br>Netherlands | A/Tufted<br>Duck/Netherlands/17017367-007/2017      | H5N6    | 09/12/2017         | Wageningen<br>Bioveterinary Research |
| EPI_ISL_33<br>2438                                   | The<br>Netherlands | A/Mute swan/Netherlands/17017903-002/2017           | H5N6    | 19/12/2017         | Wageningen<br>Bioveterinary Research |
| EPI_ISL_28<br>8409                                   | The<br>Netherlands | A/Mute Swan/Netherlands/17017367-012/2017           | H5N6    | 09/12/2017         | Wageningen<br>Bioveterinary Research |
| EPI_ISL_288410                                       | The<br>Netherlands | A/Mute Swan/Netherlands/17017377-001/2017           | H5N6    | 09/12/2017         | Wageningen<br>Bioveterinary Research |
| EPI_ISL_28<br>9714                                   | The<br>Netherlands | A/Black-headed<br>Gull/Netherlands/29/2017          | H5N6    | 18/12/2017         | Erasmus Medical Center               |
| EPI_ISL_33<br>2440                                   | The<br>Netherlands | A/Buzzard/Netherlands/18004242-002/2018             | H5N6    | 15/03/2018         | Wageningen<br>Bioveterinary Research |
| EPI_ISL_28<br>7906                                   | The<br>Netherlands | A/Duck/Netherlands/17017236-001-005/2017            | H5N6    | 07/12/2017         | Wageningen<br>Bioveterinary Research |
| EPI_ISL_28<br>7907                                   | The<br>Netherlands | A/Duck/Netherlands/17017237-001-005/2017            | H5N6    | 07/12/2017         | Wageningen<br>Bioveterinary Research |
| EPI_ISL_33<br>2441                                   | The<br>Netherlands | A/Mallard/Netherlands/18012508-017/2018             | H5N6    | 24/08/2018         | Wageningen<br>Bioveterinary Research |
| EPI_ISL_33<br>2435                                   | The<br>Netherlands | A/Chicken/Netherlands/18000887-005/2018             | H5N6    | 20/01/2018         | Wageningen<br>Bioveterinary Research |
| EPI_ISL_30<br>2826                                   | The<br>Netherlands | A/Chicken/Netherlands/EMC-14/2018                   | H5N6    | 26/02/2018         | Erasmus Medical Center               |
| EPI_ISL_30<br>2825                                   | The<br>Netherlands | A/Chicken/Netherlands/EMC-1/2018                    | H5N6    | 26/02/2018         | Erasmus Medical Center               |
| EPI_ISL_30<br>5416                                   | The<br>Netherlands | A/Domestic Duck/Netherlands/EMC-2/2018              | H5N6    | 13/03/2018         | Erasmus Medical Center               |
| EPI_ISL_30<br>5417                                   | The<br>Netherlands | A/Domestic Duck/Netherlands/EMC-6/2018              | H5N6    | 13/03/2018         | Erasmus Medical Center               |
| EPI_ISL_33<br>2439                                   | The<br>Netherlands | A/Duck/Netherlands/18003885-001-005/2018            | H5N6    | 13/03/2018         | Wageningen<br>Bioveterinary Research |
| EPI_ISL_33<br>2439                                   | The<br>Netherlands | A/Peregrine<br>falcon/Netherlands/18003274-001/2018 | H5N6    | 01/03/2018         | Wageningen<br>Bioveterinary Research |
| EPI_ISL_30<br>5453                                   | Germany            | A/chicken/Germany-SH/AR163-L02542/2018              | H5N6    | 19/03/2018         | Friedrich-Loeffl er-<br>Institut     |
| EPI_ISL_30<br>5454                                   | Germany            | A/chicken/Germany-SH/AR164-L02543/2018              | H5N6    | 19/03/2019         | Friedrich-Loeffl er-<br>Institut     |
| EPI_ISL_30<br>6989                                   | Germany            | A/turkey/Germany-SH/AR185-L02549/2018               | H5N6    | 19/03/2018         | Friedrich-Loeffl er-<br>Institut     |

|                   |                     |                                                |       |            |                                                                                        |
|-------------------|---------------------|------------------------------------------------|-------|------------|----------------------------------------------------------------------------------------|
| EPI_ISL_313226    | Germany             | A/white stork/Germany-NI/AR251/2018            | H5N6  | 04/2018    | Friedrich-Loeffler-Institut                                                            |
| EPI_ISL_313227    | Germany             | A/buzzard/Germany-NRW/AR279/2018               | H5N6  | 05/2018    | Friedrich-Loeffler-Institut                                                            |
| EPI_ISL_32179     | Germany             | A/domestic duck/Germany-MV/AR163-L02727/2018   | H5N6  | 31/08/2018 | Friedrich-Loeffler-Institut                                                            |
| EPI_ISL_291109    | Germany             | A/common_porchard/Germany-BY/AR09-L0241/2017   | H5N6  | 28/12/2017 | Friedrich-Loeffler-Institut                                                            |
| EPI_ISL_303520    | Republic of Georgia | A/Mallard/Republic of Georgia/1/2018           | H5N6  | 28/01/2018 | Erasmus Medical Center                                                                 |
| EPI_ISL_302824    | The Netherlands     | A/Eurasian wigeon/Netherlands/1/2018           | H5N6  | 07/02/2018 | Erasmus Medical Center                                                                 |
| EPI_ISL_268669    | The Netherlands     | A/T_Dk/NL Monnickendam/16013865-006-008/2016   | H5N8  | 08/11/2016 | Wageningen Bioveterinary Research                                                      |
| EPI_ISL_268630    | The Netherlands     | A/Dk/NL Biddinghuizen/16015083-016-020/2016    | H5N8  | 30/11/2016 | Wageningen Bioveterinary Research                                                      |
| EPI_ISL_300747    | Poland              | A/mute_swan/Poland/137/2017                    | H5N8  | 21/02/2017 | National Veterinary Research Institute Poland, PIWet-PIB                               |
| MW026125-MW026132 | Denmark             | A/tufted duck/Denmark/17740-1p1/2016           | H5N8  | 07/11/2016 | Statens Serum Institut                                                                 |
| MW026069-MW026076 | Denmark             | A/common buzzard/Denmark/4079-1/2017           | H5N8  | 23/03/2017 | Statens Serum Institut                                                                 |
| EPI_ISL_288362    | Greece              | A/chicken/Greece/39_2017/2017                  | H5N6  | 06/02/2017 | Animal and Plant Health Agency                                                         |
| EPI_ISL_288363    | Greece              | A/chicken/Greece/39_2017a/2017                 | H5N6  | 06/02/2017 | Animal and Plant Health Agency                                                         |
| EPI_ISL_288364    | Greece              | A/chicken/Greece/39_2017b/2017                 | H5N6  | 06/02/2017 | Animal and Plant Health Agency                                                         |
| EPI_ISL_262055    | Germany             | A/Eurasian wigeon/Germany-NI/AR249-L02143/2017 | H5N8  | 04/01/2017 | Friedrich-Loeffler-Institut                                                            |
| EPI_ISL_282143    | Italy               | A/goose/Italy/17VIR6358-3/2017                 | H5N8  | 05/08/2017 | Istituto Zooprofilattico Sperimentale Delle Venezie                                    |
| EPI_ISL_255182    | Italy               | A/turkey/Italy/17VIR538-1/2017                 | H5N8  | 20/01/2017 | Istituto Zooprofilattico Sperimentale Delle Venezie                                    |
| EPI_ISL_300744    | Poland              | A/swan/Poland/32/2017                          | H5N8  | 19/01/2017 | National Veterinary Research Institute Poland, PIWet-PIB                               |
| EPI_ISL_262058    | Germany             | A/greylag goose/Germany-NI/AR1395/L02144/2017  | H5N8  | 02/02/2017 | Friedrich-Loeffler-Institut                                                            |
| EPI_ISL_243288    | The Netherlands     | A/mallard duck/Netherlands/32/2011             | H5N2  | 20/10/2011 | Center for Research on Influenza Pathogenesis                                          |
| EPI_ISL_243513    | The Netherlands     | A/Eurasian teal/Netherlands/1/2011             | H3N8  | 15/10/2011 | Center for Research on Influenza Pathogenesis                                          |
| EPI_ISL_373081    | The Netherlands     | A/Mallard/Netherlands/21/2013                  | H3N2  | 31/12/2013 | Center for Research on Influenza Pathogenesis                                          |
| EPI_ISL_267224    | The Netherlands     | A/mallard duck/Netherlands/16/2012             | H3N2  | 17/08/2012 | Center for Research on Influenza Pathogenesis                                          |
| EPI_ISL_267376    | The Netherlands     | A/mallard duck/Netherlands/18/2012             | H4N2  | 21/08/2012 | Center for Research on Influenza Pathogenesis                                          |
| EPI_ISL_243608    | The Netherlands     | A/mallard duck/Netherlands/15/2011             | H6N8  | 14/09/2011 | Center for Research on Influenza Pathogenesis                                          |
| EPI_ISL_1889692   | Republic of Georgia | A/mallard/Republic of Georgia/12/2011          | H10N4 | 11/02/2011 | Erasmus Medical College                                                                |
| EPI_ISL_209380    | Ukraine             | A/shelduck/Yasnopolyanske/4-08-02/2011         | H1N1  | 08/02/2011 | National Scientific Center Institute of Experimental and Clinical Veterinary MedicineE |
| EPI_ISL_189700    | Republic of Georgia | A/mallard/Republic of Georgia/13/2011          | H6N2  | 26/11/2011 | Erasmus Medical College                                                                |
| EPI_ISL_300712    | Poland              | A/chicken/Poland/263/2017                      | H5N8  | 04/03/2017 | National Veterinary Research Institute Poland, PIWet-PIB                               |

|                       |                    |                                                     |      |            |                                                                  |
|-----------------------|--------------------|-----------------------------------------------------|------|------------|------------------------------------------------------------------|
| EPI_ISL_30<br>0744    | Poland             | A/swan/Poland/32/2017                               | H5N8 | 19/01/2017 | National Veterinary<br>Research Institute<br>Poland, PIWet-PIB   |
| EPI_ISL_30<br>2523    | South Korea        | A/Anas<br>platyrhynchos/Korea/W612/2017             | H5N6 | 13/12/2017 | Chungbuk National<br>University                                  |
| EPI_ISL_30<br>2823    | The<br>Netherlands | A/Great black-backed<br>gull/Netherlands/1/2017     | H5N6 | 18/12/2017 | Erasmus Medical Center                                           |
| EPI_ISL_24<br>7725    | Russia             | A/chicken/Kalmykia/2643/2016                        | H5N8 | 21/11/2016 | Vector State Research<br>Center of Virology and<br>Biotechnology |
| EPI_ISL_24<br>7725    | Russia             | A/gadwall/Kurgan/2442/2016                          | H5N8 | 27/08/2016 | Vector State Research<br>Center of Virology and<br>Biotechnology |
| EPI_ISL_30<br>9197    | Belgium            | A/Brahma<br>chicken/Belgium/6153/2017               | H5N8 | 15/06/2017 | Veterinary and<br>Agrochemical Research<br>Center                |
| EPI_ISL_30<br>9198    | Belgium            | A/Guinea fowl/Belgium/6102/2017                     | H5N8 | 14/06/2017 | Veterinary and<br>Agrochemical Research<br>Center                |
| EPI_ISL_27<br>5288    | Russia             | A/chicken/Tatarstan/88/2017                         | H5N8 | 08/05/2017 | Vector State Research<br>Center of Virology and<br>Biotechnology |
| EPI_ISL_27<br>5433    | Russia             | A/unknown/Tatarstan/86/2017                         | H5N8 | 08/05/2017 | Vector State Research<br>Center of Virology and<br>Biotechnology |
| EPI_ISL_27<br>5432    | Russia             | A/unknown/Tatarstan/94/2017                         | H5N8 | 08/05/2017 | Vector State Research<br>Center of Virology and<br>Biotechnology |
| EPI_ISL_28<br>2143    | Italy              | A/goose/Italy/17VIR6358-3/2017                      | H5N8 | 05/08/2017 | Istituto Zooprofilattico<br>Sperimentale Delle<br>Venezie        |
| EPI_ISL_27<br>3847    | Italy              | A/turkey/Italy/17VIR5878-3/2017                     | H5N8 | 23/07/2017 | Istituto Zooprofilattico<br>Sperimentale Delle<br>Venezie        |
| EPI_ISL_30<br>8782    | Japan              | A/jungle crow/Hyogo/2803E011/2018                   | H5N8 | 03/03/2018 | Avian Zoonosis<br>Research Center                                |
| EPI_ISL_28<br>9173    | Japan              | A/mute<br>swan/Shimane/3211A001/2017                | H5N8 | 05/11/2017 | Avian Zoonosis<br>Research Center                                |
| EPI_ISL_26<br>8630    | The<br>Netherlands | A/T_Dk/NL Biddinghuizen/16015083-<br>016-020/2016   | H5N8 | 30/11/2016 | Wageningen<br>Bioveterinary Research                             |
| MW026077-<br>MW026084 | Denmark            | A/common buzzard/Denmark/3794-<br>1/2017            | H5N8 | 03/03/2017 | Statens Serum Institut                                           |
| EPI_ISL_26<br>8669    | The<br>Netherlands | A/T_Dk/NL<br>Monnickendam/16013865/006/008/2<br>016 | H5N8 | 08/11/2016 | Wageningen<br>Bioveterinary Research                             |
| MW026109-<br>MW026116 | Denmark            | A/great black-backed<br>gull/Denmark/19069-1/2016   | H5N8 | 16/11/2016 | Statens Serum Institut                                           |
| MW026101-<br>MW026107 | Denmark            | A/goose/Denmark/1365-1c/2017                        | H5N8 | 06/02/2017 | Statens Serum Institut                                           |
| EPI_ISL_30<br>0747    | Poland             | A/mute swan/Poland/137/2017                         | H5N8 | 21/02/2017 | National Veterinary<br>Research Institut<br>Poland, PIWet-PIB    |
| MW026085-<br>MW026092 | Denmark            | A/common gull/Denmark/18577-<br>1/2016              | H5N8 | 16/11/2016 | Statens Serum Institut                                           |
| MW026117-<br>MW026124 | Denmark            | A/mute swan/Denmark/19192-1/2016                    | H5N8 | 19/11/2016 | Statens Serum Institut                                           |
| MW026093-<br>MW026100 | Denmark            | A/duck/Denmark/19062-5Sp1c/2016                     | H5N8 | 19/11/2016 | Statens Serum Institut                                           |
| EPI_ISL_25<br>5182    | Italy              | A/turkey/Italy/17VIR538-1/2017                      | H5N8 | 20/01/2017 | Istituto Zooprofilattico<br>Sperimentale Delle<br>Venezie        |
| EPI_ISL_24<br>0677    | Russia             | A/domestic duck/Siberia/103/2016                    | H5N8 | 04/10/2016 | Research Institute of<br>Experimental and<br>Clinical Medicine   |
| EPI_ISL_26<br>7359    | The<br>Netherlands | A/mallard duck/Netherlands/2/2004                   | H6N8 | 27/09/2004 | Center for Research on<br>Influenza Pathogenesis                 |



|                      |                     |                                               |      |            |                                                                         |
|----------------------|---------------------|-----------------------------------------------|------|------------|-------------------------------------------------------------------------|
| EPI_ISL_29<br>2418   | South Korea         | A/mandarin duck/Korea/H69/2017                | H5N6 | 19/12/2017 | Animal and Plant Health Agency                                          |
| EPI_ISL_28<br>7800   | Taiwan              | A/spoonbill/Taiwan/DB645/2017                 | H5N6 | 01/12/2017 | Animal Health Research Institute                                        |
| EPI_ISL_32<br>8973   | Republic of Georgia | A/mallard duck/Georgia/3/2016                 | H4N6 | 30/09/2016 | Center for Research on Influenza Pathogenesis                           |
| EPI_ISL_24<br>3664   | The Netherlands     | A/mallard duck/Netherlands/19/2012            | H4N6 | 07/09/2012 | Center for Research on Influenza Pathogenesis                           |
| EPI_ISL_29<br>2362   | Croatia             | A/teal/Croatia/86-25/2012                     | H4N6 | 02/09/2012 | Croatian Veterinary Institute                                           |
| EPI_ISL_13<br>2840   | Pakistan            | A/Khaki Campbell duck/Karachi/NARC-23963/2010 | H4N6 | 09/12/2010 | National Reference Laboratory for Poultry Diseases                      |
| EPI_ISL_38<br>7986   | Bangladesh          | A/duck/Bangladesh/36395/2018                  | H4N6 | 09/12/2018 | St. Jude Center of Excellence for Influenza Research and Surveillance   |
| EPI_ISL_20<br>9115   | Mongolia            | A/duck/Mongolia/127/2015                      | H4N6 | 26/08/2015 | Jun Hatamachi Hokkaido University                                       |
| EPI_ISL_23<br>1650   | Russia              | A/teal/Chany Lake/106_cloaca/2012             | H4N6 | 26/08/2012 | Research Institute of Experimental and Clinical Medicine                |
| EPI_ISL_20<br>6812   | China               | A/chicken/Hunan/S1267/2010                    | H4N6 | 03/03/2010 | State Key Laboratory of Veterinary Biotechnology                        |
| EPI_ISL_37<br>6082   | China               | A/duck/Yunnan/YN-1/2011                       | H4N6 | 17/12/2009 | Academy of Military Medical Sciences                                    |
| EPI_ISL_12<br>9199   | India               | A/chicken/India/WB-NIV101018/2009             | H4N6 | 17/12/2009 | National Institute of Virology                                          |
| EPI_ISL_12<br>1436   | Vietnam             | A/duck/Vietnam/OIE-0155/2012                  | H4N6 | 20/02/2012 | Jun Hatamachi Hokkaido University                                       |
| EPI_ISL_37<br>6208   | The Netherlands     | A/mallard/Netherlands/89/2017                 | H4N6 | 26/08/2017 | Center for Research on Influenza Pathogenesis                           |
| EPI_ISL_26<br>7342   | The Netherlands     | A/mallard duck/Netherlands/2/2013             | H3N6 | 10/09/2013 | Center for Research on Influenza Pathogenesis                           |
| EPI_ISL_15<br>8422   | Sweden              | A/mallard/Sweden/104690/2009                  | H4N6 | 21/11/2009 | Linnaeus University                                                     |
| EPI_ISL_15<br>8416   | Sweden              | A/mallard/Sweden/105137/2009                  | H4N6 | 27/11/2009 | Linnaeus University                                                     |
| EPI_ISL_89<br>981    | Czech Republic      | A/mallard/Czech Republic/13579-84K/2010       | H4N6 | 13/09/2010 | National Reference Laboratory for Avian Influenza and Newcastle Disease |
| MT755876             | Denmark             | A/mallard/Denmark/13996-26p2w/2017            | H4N6 | 11/09/2017 | Statens Serum Institut                                                  |
| MT755875             | Denmark             | A/mallard/Denmark/13996-27p2w/2017            | H4N6 | 11/09/2017 | Statens Serum Institut                                                  |
| MT755877             | Denmark             | A/mallard/Denmark/13997-29p2w/2017            | H4N6 | 11/09/2017 | Statens Serum Institut                                                  |
| MT755878<br>MT755879 | Denmark             | A/mallard/Denmark/19753-36p1w/2016            | H4N6 | 28/11/2016 | Statens Serum Institut                                                  |
| MT755880             | Denmark             | A/mallard/Denmark/14716-38p2w/2018            | H4N6 | 22/10/2018 | Statens Serum Institut                                                  |
| EPI_ISL_37<br>3090   | The Netherlands     | A/mallard/Netherlands/39/2015                 | H4N6 | 08/09/2015 | -                                                                       |
| EPI_ISL_15<br>8419   | Sweden              | A/mallard/Sweden/124418/2010                  | H4N6 | 03/11/2010 | Linnaeus University                                                     |
| MT755881             | Denmark             | A/mallard/Denmark/15487-54p2w/2018            | H4N6 | 06/11/2018 | Statens Serum Institut                                                  |
| EPI_ISL_33<br>2402   | China               | A/Jiangsu/1/2018                              | H5N6 | 06/11/2018 | Jiangsu Provincial Center for Disease Control and Prevention            |
| EPI_ISL_16<br>3493   | China               | A/Sichuan/26221/2014                          | H5N6 | 21/04/2014 | WHO Chinese National Influenza Center                                   |
| EPI_ISL_15<br>0054   | Sweden              | A/mallard/Sweden/40/2002                      | H5N6 | 12/11/2002 | Erasmus Medical Center                                                  |

|                    |                    |                                             |      |            |                                                                                |
|--------------------|--------------------|---------------------------------------------|------|------------|--------------------------------------------------------------------------------|
| EPI_ISL_29<br>8640 | Israel             | A/turkey/Israel/1045/2016                   | H5N8 | 20/12/2016 | Kimron Veterinari<br>Institute                                                 |
| EPI_ISL_38<br>9751 | Egypt              | A/chicken/Egypt/M14081D/2017                | H5N8 | 10/05/2018 | St. Jude Center of<br>Excellence for influenza<br>Research and<br>Surveillance |
| EPI_ISL_24<br>7720 | Russia             | A/chicken/Voronezh/20/2017                  | H5N8 | 06/06/2017 | Vector State Research<br>Center of Virology and<br>Biotechnology               |
| EPI_ISL_24<br>7722 | Russia             | A/goose/Krasnodar/3144/2017                 | H5N8 | 06/01/2017 | Vector State Research<br>Center of Virology and<br>Biotechnology               |
| EPI_ISL_26<br>6537 | Belgium            | A/peacock/Belgium/1017/2017                 | H5N8 | 08/02/2017 | Veterinary and<br>Agrochemical Research<br>Center                              |
| EPI_ISL_26<br>6418 | South Korea        | A/common teal/Korea/W549/2016               | H5N8 | 15/12/2016 | Chungbuk National<br>University                                                |
| EPI_ISL_28<br>7565 | The<br>Netherlands | A/M_swan/NL Groningen/16015826-<br>001/2016 | H5N5 | 13/12/2015 | Wageningen<br>Bioveterinary Research                                           |
